# Supplementary material for: Antimicrobial Resistance of Listeria monocytogenes from Animal Foods to First- and Second-Line Drugs in the Treatment of Listeriosis from 2008 to 2021: A Systematic Review and Meta-Analysis
Source: Hindawi journal article supplement (doi:10.1155/2022/1351983), 2022-10-07
Supplement: f1 [file 1351983.f1.pdf]

| Study                    | Year | Country     | Continent | Animal Chain | Source of Isolation      | Antibiotics                   | Class             | METANALISIS      | RESISTENT | TOTAL |
|--------------------------|------|-------------|-----------|--------------|--------------------------|-------------------------------|-------------------|------------------|-----------|-------|
| Arslan et al. (2008)     | 2008 | Peru        | Asia      | dairy        | product                  | Cefaclor                      | Cefens            | NON-CONVENTIONAL | 1         | 47    |
| Arslan et al. (2008)     | 2008 | Peru        | Asia      | dairy        | product                  | Clarithromycin                | Macrolides        | NON-CONVENTIONAL | 3         | 47    |
| Arslan et al. (2008)     | 2008 | Peru        | Asia      | dairy        | product                  | Tetracycline                  | Tetracyclines     | NON-CONVENTIONAL | 1         | 47    |
| Arslan et al. (2008)     | 2008 | Peru        | Asia      | dairy        | product                  | Ciprofloxacin                 | Quinolones        | NON-CONVENTIONAL | 0         | 47    |
| Arslan et al. (2008)     | 2008 | Peru        | Asia      | dairy        | product                  | Chloramphenicol               | Phenicol          | NON-CONVENTIONAL | 4         | 47    |
| Arslan et al. (2008)     | 2008 | Peru        | Asia      | dairy        | product                  | Rifampicin                    | Macrolides        | NON-CONVENTIONAL | 0         | 47    |
| Arslan et al. (2008)     | 2008 | Peru        | Asia      | dairy        | product                  | Ampicillin                    | Penicillins       | CONVENTIONAL     | 1         | 47    |
| Arslan et al. (2008)     | 2008 | Peru        | Asia      | dairy        | product                  | Penicillin                    | Penicillins       | CONVENTIONAL     | 6         | 47    |
| Arslan et al. (2008)     | 2008 | Peru        | Asia      | dairy        | product                  | Amikacin                      | Aminoglycosides   | CONVENTIONAL     | 2         | 47    |
| Arslan et al. (2008)     | 2008 | Peru        | Asia      | dairy        | product                  | Gentamicin                    | Aminoglycosides   | CONVENTIONAL     | 0         | 47    |
| Arslan et al. (2008)     | 2008 | Peru        | Asia      | dairy        | product                  | Trimethoprim/Sulfamethoxazole | Folate inhibitors | CONVENTIONAL     | 0         | 47    |
| Basha et al. (2019)      | 2019 | India       | Asia      | fish         | product                  | Erythromycin                  | Macrolides        | NON-CONVENTIONAL | 11        | 11    |
| Basha et al. (2019)      | 2019 | India       | Asia      | fish         | product                  | Tetracycline                  | Tetracyclines     | NON-CONVENTIONAL | 11        | 11    |
| Basha et al. (2019)      | 2019 | India       | Asia      | fish         | product                  | Clindamycin                   | lincosamides      | NON-CONVENTIONAL | 11        | 11    |
| Basha et al. (2019)      | 2019 | India       | Asia      | fish         | product                  | Ampicillin                    | Penicillins       | CONVENTIONAL     | 11        | 11    |
| Basha et al. (2019)      | 2019 | India       | Asia      | fish         | product                  | Penicillin                    | Penicillins       | CONVENTIONAL     | 11        | 11    |
| Bertsch et al. (2014)    | 2014 | Switzerland | Europe    | dairy        | product                  | Tetracycline                  | Tetracyclines     | NON-CONVENTIONAL | 11        | 46    |
| Bertsch et al. (2014)    | 2014 | Switzerland | Europe    | fish         | product                  | Tetracycline                  | Tetracyclines     | NON-CONVENTIONAL | 11        | 18    |
| Bertsch et al. (2014)    | 2014 | Switzerland | Europe    | chicken      | product                  | Tetracycline                  | Tetracyclines     | NON-CONVENTIONAL | 11        | 24    |
| Bertsch et al. (2014)    | 2014 | Switzerland | Europe    | chicken      | product                  | Clindamycin                   | lincosamides      | NON-CONVENTIONAL | 4         | 24    |
| Bertsch et al. (2014)    | 2014 | Switzerland | Europe    | chicken      | product                  | Trimethoprim                  | Folate inhibitors | CONVENTIONAL     | 3         | 24    |
| Bertsch et al. (2014)    | 2014 | Switzerland | Europe    | beef         | product                  | Tetracycline                  | Tetracyclines     | NON-CONVENTIONAL | 11        | 132   |
| Bertsch et al. (2014)    | 2014 | Switzerland | Europe    | beef         | product                  | Clindamycin                   | lincosamides      | NON-CONVENTIONAL | 4         | 132   |
| Bertsch et al. (2014)    | 2014 | Switzerland | Europe    | dairy        | product                  | Clindamycin                   | lincosamides      | NON-CONVENTIONAL | 4         | 46    |
| Bertsch et al. (2014)    | 2014 | Switzerland | Europe    | fish         | product                  | Clindamycin                   | lincosamides      | NON-CONVENTIONAL | 4         | 18    |
| Bertsch et al. (2014)    | 2014 | Switzerland | Europe    | beef         | product                  | Trimethoprim                  | Folate inhibitors | CONVENTIONAL     | 3         | 132   |
| Bertsch et al. (2014)    | 2014 | Switzerland | Europe    | dairy        | product                  | Trimethoprim                  | Folate inhibitors | CONVENTIONAL     | 3         | 46    |
| Bertsch et al. (2014)    | 2014 | Switzerland | Europe    | fish         | product                  | Trimethoprim                  | Folate inhibitors | CONVENTIONAL     | 3         | 18    |
| Bouymajane et al. (2021) | 2021 | Marocco     | Africa    | whey milk    | Environmental/processing | kanamycin                     | Aminoglycosides   | CONVENTIONAL     | 3         | 3     |
| Bouymajane et al. (2021) | 2021 | Marocco     | Africa    | whey milk    | Environmental/processing | Vancomycin                    | Glycopeptides     | NON-CONVENTIONAL | 3         | 3     |
| Bouymajane et al. (2021) | 2021 | Marocco     | Africa    | whey milk    | Environmental/processing | Streptomycin                  | Aminoglycosides   | CONVENTIONAL     | 3         | 3     |
| Bouymajane et al. (2021) | 2021 | Marocco     | Africa    | whey milk    | Environmental/processing | Amikacin                      | Aminoglycosides   | CONVENTIONAL     | 3         | 3     |
| Bouymajane et al. (2021) | 2021 | Marocco     | Africa    | whey milk    | Environmental/processing | Gentamicin                    | Aminoglycosides   | CONVENTIONAL     | 3         | 3     |
| Bouymajane et al. (2021) | 2021 | Marocco     | Africa    | whey milk    | Environmental/processing | Chloramphenicol               | Phenicol          | NON-CONVENTIONAL | 3         | 3     |
| Bouymajane et al. (2021) | 2021 | Marocco     | Africa    | whey milk    | Environmental/processing | Ampicillin                    | Penicillins       | CONVENTIONAL     | 3         | 3     |
| Bouymajane et al. (2021) | 2021 | Marocco     | Africa    | whey milk    | Environmental/processing | Sulfamethoxazole              | Folate inhibitors | CONVENTIONAL     | 3         | 3     |
| Bouymajane et al. (2021) | 2021 | Marocco     | Africa    | whey milk    | Environmental/processing | Amoxicillin                   | $\beta$ -lactams  | CONVENTIONAL     | 3         | 3     |
| Bouymajane et al. (2021) | 2021 | Marocco     | Africa    | whey milk    | Environmental/processing | Erythromycin                  | Macrolides        | NON-CONVENTIONAL | 3         | 3     |
| Bouymajane et al. (2021) | 2021 | Marocco     | Africa    | whey milk    | Environmental/processing | Streptomycin                  | Aminoglycosides   | CONVENTIONAL     | 3         | 3     |
| Bouymajane et al. (2021) | 2021 | Marocco     | Africa    | raw milk     | Environmental/processing | Ampicillin                    | Penicillins       | CONVENTIONAL     | 3         | 3     |
| Bouymajane et al. (2021) | 2021 | Marocco     | Africa    | raw milk     | Environmental/processing | Amikacin                      | Aminoglycosides   | CONVENTIONAL     | 3         | 3     |
| Bouymajane et al. (2021) | 2021 | Marocco     | Africa    | raw milk     | Environmental/processing | Erythromycin                  | Macrolides        | NON-CONVENTIONAL | 3         | 3     |
| Bouymajane et al. (2021) | 2021 | Marocco     | Africa    | raw milk     | Environmental/processing | Sulfamethoxazole              | Folate inhibitors | CONVENTIONAL     | 3         | 3     |
| Bouymajane et al. (2021) | 2021 | Marocco     | Africa    | raw milk     | Environmental/processing | Trimethoprim/Sulfamethoxazole | Folate inhibitors | CONVENTIONAL     | 3         | 3     |
| Bouymajane et al. (2021) | 2021 | Marocco     | Africa    | raw milk     | Environmental/processing | Ciprofloxacin                 | Quinolones        | NON-CONVENTIONAL | 3         | 3     |
| Bouymajane et al. (2021) | 2021 | Marocco     | Africa    | raw milk     | Environmental/processing | Amoxicillin                   | $\beta$ -lactams  | CONVENTIONAL     | 3         | 3     |
| Bouymajane et al. (2021) | 2021 | Marocco     | Africa    | chicken      | product                  | Amoxicillin                   | $\beta$ -lactams  | CONVENTIONAL     | 1         | 1     |
| Bouymajane et al. (2021) | 2021 | Marocco     | Africa    | chicken      | product                  | Erythromycin                  | Macrolides        | NON-CONVENTIONAL | 1         | 1     |
| Bouymajane et al. (2021) | 2021 | Marocco     | Africa    | chicken      | product                  | Sulfamethoxazole              | Folate inhibitors | CONVENTIONAL     | 1         | 1     |
| Bouymajane et al. (2021) | 2021 | Marocco     | Africa    | chicken      | product                  | Tetracycline                  | Tetracyclines     | NON-CONVENTIONAL | 1         | 1     |
| Bouymajane et al. (2021) | 2021 | Marocco     | Africa    | beef         | product                  | Amoxicillin                   | $\beta$ -lactams  | CONVENTIONAL     | 4         | 4     |
| Bouymajane et al. (2021) | 2021 | Marocco     | Africa    | beef         | product                  | Erythromycin                  | Macrolides        | NON-CONVENTIONAL | 4         | 4     |
| Bouymajane et al. (2021) | 2021 | Marocco     | Africa    | beef         | product                  | Sulfamethoxazole              | Folate inhibitors | CONVENTIONAL     | 4         | 4     |
| Bouymajane et al. (2021) | 2021 | Marocco     | Africa    | beef         | product                  | Tetracycline                  | Tetracyclines     | NON-CONVENTIONAL | 4         | 4     |
| Bouymajane et al. (2021) | 2021 | Marocco     | Africa    | beef         | product                  | Ampicillin                    | Penicillins       | CONVENTIONAL     | 4         | 4     |
| Bouymajane et al. (2021) | 2021 | Marocco     | Africa    | beef         | product                  | Erythromycin                  | Macrolides        | NON-CONVENTIONAL | 1         | 1     |
| Bouymajane et al. (2021) | 2021 | Marocco     | Africa    | beef         | product                  | Sulfamethoxazole              | Folate inhibitors | CONVENTIONAL     | 1         | 1     |
| Bouymajane et al. (2021) | 2021 | Marocco     | Africa    | beef         | product                  | Trimethoprim/Sulfamethoxazole | Folate inhibitors | CONVENTIONAL     | 1         | 1     |

|                          |      |               |               |         |               |                               |                   |                  |    |     |
|--------------------------|------|---------------|---------------|---------|---------------|-------------------------------|-------------------|------------------|----|-----|
| Bouymajane et al. (2021) | 2021 | Marocco       | Africa        | chicken | product       | Amoxicillin                   | β- lactams        | CONVENTIONAL     | 3  | 3   |
| Bouymajane et al. (2021) | 2021 | Marocco       | Africa        | chicken | product       | Sulfamethoxazole              | Folate inhibitors | CONVENTIONAL     | 3  | 3   |
| Bouymajane et al. (2021) | 2021 | Marocco       | Africa        | chicken | product       | Trimethoprim/Sulfamethoxazole | Folate inhibitors | CONVENTIONAL     | 3  | 3   |
| Camargo et al. (2015)    | 2015 | Brazil        | South America | beef    | Environmental | Clindamycin                   | lincosamides      | NON-CONVENTIONAL | 67 | 72  |
| Camargo et al. (2015)    | 2015 | Brazil        | South America | beef    | Environmental | Oxacillin                     | Penicillins       | CONVENTIONAL     | 43 | 78  |
| Camargo et al. (2015)    | 2015 | Brazil        | South America | beef    | product       | Clindamycin                   | lincosamides      | NON-CONVENTIONAL | 67 | 72  |
| Camargo et al. (2015)    | 2015 | Brazil        | South America | beef    | product       | Oxacillin                     | Penicillins       | CONVENTIONAL     | 43 | 78  |
| Carvalho et al. (2019)   | 2019 | Brazil        | South America | chicken | Environmental | Ciprofloxacin                 | Fluoroquinolones  | NON-CONVENTIONAL | 3  | 37  |
| Carvalho et al. (2019)   | 2019 | Brazil        | South America | chicken | Environmental | Enrofloxacin                  | Fluoroquinolones  | NON-CONVENTIONAL | 1  | 37  |
| Carvalho et al. (2019)   | 2019 | Brazil        | South America | chicken | Environmental | Nitrofurantoin                | Nitrofurans       | NON-CONVENTIONAL | 7  | 37  |
| Carvalho et al. (2019)   | 2019 | Brazil        | South America | chicken | Environmental | Rifampicin                    | Ansamycin         | NON-CONVENTIONAL | 1  | 37  |
| Carvalho et al. (2019)   | 2019 | Brazil        | South America | chicken | Environmental | Chloramphenicol               | Phenicol          | NON-CONVENTIONAL | 1  | 37  |
| Carvalho et al. (2019)   | 2019 | Brazil        | South America | chicken | Environmental | Erythromycin                  | Macrolides        | NON-CONVENTIONAL | 1  | 37  |
| Carvalho et al. (2019)   | 2019 | Brazil        | South America | chicken | Environmental | Sulfonamides                  | Folate inhibitors | CONVENTIONAL     | 34 | 37  |
| Carvalho et al. (2019)   | 2019 | Brazil        | South America | chicken | Environmental | Trimethoprim                  | Folate inhibitors | CONVENTIONAL     | 1  | 37  |
| Carvalho et al. (2019)   | 2019 | Brazil        | South America | chicken | Environmental | Ampicillin                    | Penicillins       | CONVENTIONAL     | 25 | 37  |
| Carvalho et al. (2019)   | 2019 | Brazil        | South America | chicken | Environmental | Gentamicin                    | Aminoglycosides   | CONVENTIONAL     | 3  | 37  |
| Davis et al. (2009)      | 2009 | United States | North America | beef    | animal        | Clindamycin                   | lincosamides      | NON-CONVENTIONAL | 6  | 6   |
| Davis et al. (2009)      | 2009 | United States | North America | beef    | animal        | Ciprofloxacin                 | Quinolones        | NON-CONVENTIONAL | 0  | 6   |
| Davis et al. (2009)      | 2009 | United States | North America | beef    | animal        | Ceftriaxone                   | Cefens            | NON-CONVENTIONAL | 0  | 6   |
| Davis et al. (2009)      | 2009 | United States | North America | beef    | animal        | Quinupristine / Dalfopristin  | Streptogramins    | NON-CONVENTIONAL | 0  | 6   |
| Davis et al. (2009)      | 2009 | United States | North America | pork    | animal        | Clindamycin                   | lincosamides      | NON-CONVENTIONAL | 0  | 1   |
| Davis et al. (2009)      | 2009 | United States | North America | pork    | animal        | Ciprofloxacin                 | Quinolones        | NON-CONVENTIONAL | 0  | 1   |
| Davis et al. (2009)      | 2009 | United States | North America | pork    | animal        | Ceftriaxone                   | Cefens            | NON-CONVENTIONAL | 0  | 1   |
| Davis et al. (2009)      | 2009 | United States | North America | pork    | animal        | Quinupristine / Dalfopristin  | Streptogramins    | NON-CONVENTIONAL | 0  | 1   |
| Davis et al. (2009)      | 2009 | United States | North America | beef    | animal        | Oxacillin                     | Penicillins       | CONVENTIONAL     | 5  | 6   |
| Davis et al. (2009)      | 2009 | United States | North America | pork    | animal        | Oxacillin                     | Penicillins       | CONVENTIONAL     | 0  | 1   |
| Davis et al. (2009)      | 2009 | United States | North America | dairy   | product       | Clindamycin                   | lincosamides      | NON-CONVENTIONAL | 0  | 5   |
| Davis et al. (2009)      | 2009 | United States | North America | dairy   | product       | Ciprofloxacin                 | Quinolones        | NON-CONVENTIONAL | 5  | 5   |
| Davis et al. (2009)      | 2009 | United States | North America | dairy   | product       | Ceftriaxone                   | Cefens            | NON-CONVENTIONAL | 5  | 5   |
| Davis et al. (2009)      | 2009 | United States | North America | dairy   | product       | Quinupristine / Dalfopristin  | Streptogramins    | NON-CONVENTIONAL | 5  | 5   |
| Davis et al. (2009)      | 2009 | United States | North America | beef    | product       | Clindamycin                   | lincosamides      | NON-CONVENTIONAL | 0  | 5   |
| Davis et al. (2009)      | 2009 | United States | North America | beef    | product       | Ciprofloxacin                 | Quinolones        | NON-CONVENTIONAL | 5  | 5   |
| Davis et al. (2009)      | 2009 | United States | North America | beef    | product       | Ceftriaxone                   | Cefens            | NON-CONVENTIONAL | 5  | 5   |
| Davis et al. (2009)      | 2009 | United States | North America | beef    | product       | Quinupristine / Dalfopristin  | Streptogramins    | NON-CONVENTIONAL | 5  | 5   |
| Davis et al. (2009)      | 2009 | United States | North America | pork    | product       | Clindamycin                   | lincosamides      | NON-CONVENTIONAL | 0  | 3   |
| Davis et al. (2009)      | 2009 | United States | North America | pork    | product       | Ciprofloxacin                 | Quinolones        | NON-CONVENTIONAL | 0  | 3   |
| Davis et al. (2009)      | 2009 | United States | North America | pork    | product       | Ceftriaxone                   | Cefens            | NON-CONVENTIONAL | 0  | 3   |
| Davis et al. (2009)      | 2009 | United States | North America | pork    | product       | Quinupristine / Dalfopristin  | Streptogramins    | NON-CONVENTIONAL | 0  | 3   |
| Davis et al. (2009)      | 2009 | United States | North America | chicken | product       | Clindamycin                   | lincosamides      | NON-CONVENTIONAL | 0  | 4   |
| Davis et al. (2009)      | 2009 | United States | North America | chicken | product       | Ciprofloxacin                 | Quinolones        | NON-CONVENTIONAL | 0  | 4   |
| Davis et al. (2009)      | 2009 | United States | North America | chicken | product       | Ceftriaxone                   | Cefens            | NON-CONVENTIONAL | 0  | 4   |
| Davis et al. (2009)      | 2009 | United States | North America | chicken | product       | Quinupristine / Dalfopristin  | Streptogramins    | NON-CONVENTIONAL | 0  | 4   |
| Davis et al. (2009)      | 2009 | United States | North America | dairy   | product       | Oxacillin                     | Penicillins       | CONVENTIONAL     | 5  | 5   |
| Davis et al. (2009)      | 2009 | United States | North America | beef    | product       | Oxacillin                     | Penicillins       | CONVENTIONAL     | 5  | 5   |
| Davis et al. (2009)      | 2009 | United States | North America | pork    | product       | Oxacillin                     | Penicillins       | CONVENTIONAL     | 0  | 3   |
| Davis et al. (2009)      | 2009 | United States | North America | chicken | product       | Oxacillin                     | Penicillins       | CONVENTIONAL     | 0  | 4   |
| Garedew et al. (2015)    | 2015 | Ethiopia      | Africa        | beef    | Environmental | Chloramphenicol               | Phenicol          | NON-CONVENTIONAL | 4  | 140 |
| Garedew et al. (2015)    | 2015 | Ethiopia      | Africa        | beef    | Environmental | Nalidixic acid                | Quinolones        | NON-CONVENTIONAL | 12 | 140 |
| Garedew et al. (2015)    | 2015 | Ethiopia      | Africa        | beef    | Environmental | Tetracycline                  | Tetracyclines     | NON-CONVENTIONAL | 9  | 140 |
| Garedew et al. (2015)    | 2015 | Ethiopia      | Africa        | beef    | Environmental | Penicillin                    | Penicillins       | CONVENTIONAL     | 16 | 140 |
| Granier et al. (2011)    | 2011 | France        | Europe        | beef    | Environmental | Erythromycin                  | Macrolides        | NON-CONVENTIONAL | 0  | 10  |
| Granier et al. (2011)    | 2011 | France        | Europe        | beef    | Environmental | Tetracycline                  | Tetracyclines     | NON-CONVENTIONAL | 0  | 10  |
| Granier et al. (2011)    | 2011 | France        | Europe        | beef    | Environmental | Trimethoprim                  | Folate inhibitors | CONVENTIONAL     | 1  | 10  |
| Granier et al. (2011)    | 2011 | France        | Europe        | pork    | animal        | Erythromycin                  | Macrolides        | NON-CONVENTIONAL | 0  | 20  |
| Granier et al. (2011)    | 2011 | France        | Europe        | pork    | animal        | Tetracycline                  | Tetracyclines     | NON-CONVENTIONAL | 1  | 20  |
| Granier et al. (2011)    | 2011 | France        | Europe        | pork    | animal        | Trimethoprim                  | Folate inhibitors | CONVENTIONAL     | 0  | 20  |
| Lili et al. (2016)       | 2016 | China         | Asia          | pork    | Environmental | Cephalosporin                 | Cefens            | NON-CONVENTIONAL | 0  | 13  |
| Lili et al. (2016)       | 2016 | China         | Asia          | pork    | Environmental | Cefotaxime                    | Cefens            | NON-CONVENTIONAL | 0  | 13  |

|                         |      |               |               |         |               |                               |                   |                  |     |     |
|-------------------------|------|---------------|---------------|---------|---------------|-------------------------------|-------------------|------------------|-----|-----|
| Lili et al. (2016)      | 2016 | China         | Asia          | pork    | Environmental | Tetracycline                  | Tetracyclines     | NON-CONVENTIONAL | 6   | 13  |
| Lili et al. (2016)      | 2016 | China         | Asia          | pork    | Environmental | Doxycycline                   | Tetracyclines     | NON-CONVENTIONAL | 0   | 13  |
| Lili et al. (2016)      | 2016 | China         | Asia          | pork    | Environmental | Erythromycin                  | Macrolides        | NON-CONVENTIONAL | 0   | 13  |
| Lili et al. (2016)      | 2016 | China         | Asia          | pork    | Environmental | Rifampicin                    | Macrolides        | NON-CONVENTIONAL | 0   | 13  |
| Lili et al. (2016)      | 2016 | China         | Asia          | pork    | Environmental | Chloramphenicol               | Phenicol          | NON-CONVENTIONAL | 0   | 13  |
| Lili et al. (2016)      | 2016 | China         | Asia          | pork    | Environmental | Ampicillin                    | Penicillins       | CONVENTIONAL     | 0   | 13  |
| Lili et al. (2016)      | 2016 | China         | Asia          | pork    | Environmental | Streptomycin                  | Aminoglycosides   | CONVENTIONAL     | 0   | 13  |
| Lili et al. (2016)      | 2016 | China         | Asia          | pork    | Environmental | Gentamicin                    | Aminoglycosides   | CONVENTIONAL     | 0   | 13  |
| Lili et al. (2016)      | 2016 | China         | Asia          | pork    | Environmental | Trimethoprim                  | Folate inhibitors | CONVENTIONAL     | 0   | 13  |
| Lili et al. (2016)      | 2016 | China         | Asia          | pork    | product       | Cephalosporin                 | Cefens            | NON-CONVENTIONAL | 3   | 65  |
| Lili et al. (2016)      | 2016 | China         | Asia          | pork    | product       | Cefotaxime                    | Cefens            | NON-CONVENTIONAL | 6   | 65  |
| Lili et al. (2016)      | 2016 | China         | Asia          | pork    | product       | Tetracycline                  | Tetracyclines     | NON-CONVENTIONAL | 10  | 65  |
| Lili et al. (2016)      | 2016 | China         | Asia          | pork    | product       | Doxycycline                   | Tetracyclines     | NON-CONVENTIONAL | 4   | 65  |
| Lili et al. (2016)      | 2016 | China         | Asia          | pork    | product       | Erythromycin                  | Macrolides        | NON-CONVENTIONAL | 4   | 65  |
| Lili et al. (2016)      | 2016 | China         | Asia          | pork    | product       | Rifampicin                    | Macrolides        | NON-CONVENTIONAL | 3   | 65  |
| Lili et al. (2016)      | 2016 | China         | Asia          | pork    | product       | Chloramphenicol               | Phenicol          | NON-CONVENTIONAL | 2   | 65  |
| Lili et al. (2016)      | 2016 | China         | Asia          | pork    | product       | Ampicillin                    | Penicillins       | CONVENTIONAL     | 1   | 65  |
| Lili et al. (2016)      | 2016 | China         | Asia          | pork    | product       | Streptomycin                  | Aminoglycosides   | CONVENTIONAL     | 7   | 65  |
| Lili et al. (2016)      | 2016 | China         | Asia          | pork    | product       | Gentamicin                    | Aminoglycosides   | CONVENTIONAL     | 5   | 65  |
| Lili et al. (2016)      | 2016 | China         | Asia          | pork    | product       | Trimethoprim                  | Folate inhibitors | CONVENTIONAL     | 4   | 65  |
| Lyon et al. (2008)      | 2008 | United States | North America | chicken | Environmental | Ceftriaxone                   | Cefens            | NON-CONVENTIONAL | 93  | 157 |
| Lyon et al. (2008)      | 2008 | United States | North America | chicken | Environmental | Ciprofloxacin                 | Quinolones        | NON-CONVENTIONAL | 5   | 157 |
| Lyon et al. (2008)      | 2008 | United States | North America | chicken | Environmental | Clindamycin                   | lincosamides      | NON-CONVENTIONAL | 0   | 157 |
| Lyon et al. (2008)      | 2008 | United States | North America | chicken | Environmental | Tetracycline                  | Tetracyclines     | NON-CONVENTIONAL | 5   | 157 |
| Lyon et al. (2008)      | 2008 | United States | North America | chicken | Environmental | Linezolid                     | Oxazolidinone     | NON-CONVENTIONAL | 0   | 157 |
| Lyon et al. (2008)      | 2008 | United States | North America | chicken | Environmental | Oxacillin                     | Penicillins       | CONVENTIONAL     | 142 | 157 |
| Lyon et al. (2008)      | 2008 | United States | North America | chicken | Environmental | Trimethoprim/Sulfamethoxazole | Folate inhibitors | CONVENTIONAL     | 0   | 157 |
| Osaili et al. (2012)    | 2012 | Jordan        | Asia          | dairy   | product       | Phosphomycin                  | Phosphomycins     | NON-CONVENTIONAL | 39  | 39  |
| Osaili et al. (2012)    | 2012 | Jordan        | Asia          | dairy   | product       | Oxacillin                     | Penicillins       | CONVENTIONAL     | 36  | 39  |
| Sala et al. (2016)      | 2016 | Romania       | Europe        | pork    | Environmental | Benzylpenicillin              | Oxazolidinone     | NON-CONVENTIONAL | 25  | 25  |
| Sala et al. (2016)      | 2016 | Romania       | Europe        | pork    | Environmental | Imipenem                      | Carbapenems       | NON-CONVENTIONAL | 25  | 25  |
| Sala et al. (2016)      | 2016 | Romania       | Europe        | pork    | Environmental | Fusidic Acid                  | Triterpenoids     | NON-CONVENTIONAL | 25  | 25  |
| Sala et al. (2016)      | 2016 | Romania       | Europe        | pork    | Environmental | Phosphomycin                  | Phosphomycins     | NON-CONVENTIONAL | 23  | 25  |
| Sala et al. (2016)      | 2016 | Romania       | Europe        | pork    | Environmental | Clindamycin                   | lincosamides      | NON-CONVENTIONAL | 22  | 25  |
| Sala et al. (2016)      | 2016 | Romania       | Europe        | pork    | Environmental | Rifampicin                    | Macrolides        | NON-CONVENTIONAL | 14  | 25  |
| Sala et al. (2016)      | 2016 | Romania       | Europe        | pork    | Environmental | Tetracycline                  | Tetracyclines     | NON-CONVENTIONAL | 11  | 25  |
| Sala et al. (2016)      | 2016 | Romania       | Europe        | pork    | Environmental | Ciprofloxacin                 | Quinolones        | NON-CONVENTIONAL | 1   | 25  |
| Sala et al. (2016)      | 2016 | Romania       | Europe        | pork    | Environmental | Oxacillin                     | Penicillins       | CONVENTIONAL     | 23  | 25  |
| Sala et al. (2016)      | 2016 | Romania       | Europe        | pork    | Environmental | Trimethoprim                  | Folate inhibitors | CONVENTIONAL     | 12  | 25  |
| Sereno et al. (2019)    | 2019 | Brazil        | South America | pork    | Environmental | Clindamycin                   | lincosamides      | NON-CONVENTIONAL | 5   | 87  |
| Sereno et al. (2019)    | 2019 | Brazil        | South America | pork    | Environmental | Tetracycline                  | Tetracyclines     | NON-CONVENTIONAL | 1   | 87  |
| Sereno et al. (2019)    | 2019 | Brazil        | South America | pork    | Environmental | Erythromycin                  | Macrolides        | NON-CONVENTIONAL | 1   | 87  |
| Sereno et al. (2019)    | 2019 | Brazil        | South America | pork    | Environmental | kanamycin                     | Aminoglycosides   | CONVENTIONAL     | 1   | 87  |
| Sereno et al. (2019)    | 2019 | Brazil        | South America | pork    | Environmental | Ampicillin                    | Penicillins       | CONVENTIONAL     | 16  | 87  |
| Sereno et al. (2019)    | 2019 | Brazil        | South America | pork    | Environmental | Penicillin                    | Penicillins       | CONVENTIONAL     | 3   | 87  |
| Sereno et al. (2019)    | 2019 | Brazil        | South America | pork    | Environmental | Trimethoprim/Sulfamethoxazole | Folate inhibitors | CONVENTIONAL     | 1   | 87  |
| Teixeira et al. (2019)  | 2019 | Brazil        | South America | beef    | product       | Cefoxitin                     | Cephalosporin     | NON-CONVENTIONAL | 6   | 6   |
| Teixeira et al. (2019)  | 2019 | Brazil        | South America | beef    | product       | Cefepime                      | Cephalosporin     | NON-CONVENTIONAL | 5   | 6   |
| Teixeira et al. (2019)  | 2019 | Brazil        | South America | beef    | product       | Sulfonamides                  | Folate inhibitors | CONVENTIONAL     | 3   | 6   |
| Wieczorek et al. (2012) | 2012 | Poland        | Europe        | beef    | product       | ceftriaxone                   | Cefens            | NON-CONVENTIONAL | 14  | 81  |
| Wieczorek et al. (2012) | 2012 | Poland        | Europe        | beef    | product       | Clindamycin                   | lincosamides      | NON-CONVENTIONAL | 0   | 81  |
| Wieczorek et al. (2012) | 2012 | Poland        | Europe        | beef    | product       | Ciprofloxacin                 | Quinolones        | NON-CONVENTIONAL | 3   | 81  |
| Wieczorek et al. (2012) | 2012 | Poland        | Europe        | beef    | product       | Quinupristine / Dalfopristin  | Streptogramins    | NON-CONVENTIONAL | 3   | 81  |
| Wieczorek et al. (2012) | 2012 | Poland        | Europe        | beef    | product       | Linezolid                     | Penicillins       | NON-CONVENTIONAL | 0   | 81  |
| Wieczorek et al. (2012) | 2012 | Poland        | Europe        | beef    | product       | Oxacillin                     | Penicillins       | CONVENTIONAL     | 59  | 81  |
